# Supplementary material for: Lipid droplets are functionally connected to the endoplasmic reticulum in Saccharomyces cerevisiae
Source: Oxford University Press journal article supplement (doi:10.1242/jcs.076836), 2011-06-22
Supplement: jcs076836tables1.pdf [file jcs076836tables1.pdf]

**Table S1.** *S. cerevisiae* strains used in this study

| Strain  | Relevant Genotype                                                                                                                                                                                                                               | Source     |
|---------|-------------------------------------------------------------------------------------------------------------------------------------------------------------------------------------------------------------------------------------------------|------------|
| RSY1533 | <i>MAT<math>\alpha</math> leu2<math>\Delta</math>0 ura3<math>\Delta</math>0 his3<math>\Delta</math>1 lys2<math>\Delta</math>0 MET15</i>                                                                                                         | Euroscarf  |
| RSY2307 | <i>MAT<math>\alpha</math> leu2<math>\Delta</math>0 ura3<math>\Delta</math>0 his3<math>\Delta</math>1 lys2<math>\Delta</math>0 pGAL-PMA1-GFP-URA3</i>                                                                                            | This Study |
| RSY3000 | <i>MAT<math>\alpha</math> dga1::URA3 lro1::TRP1 are1::HIS3 are2::LEU2 ADE2 HDEL-RFP-URA3 ERG6-GFP::KanMX</i>                                                                                                                                    | This Study |
| RSY3021 | <i>MAT<math>\alpha</math> his3<math>\Delta</math>1 leu2<math>\Delta</math>0 lys2<math>\Delta</math>0 ura3<math>\Delta</math>0 are1::KanMX are2::KanMX trp1::URA3 GAL-LRO1::TRP1 dga1::loxP</i>                                                  | This Study |
| RSY3097 | <i>MAT<math>\alpha</math> his3<math>\Delta</math>1 leu2<math>\Delta</math>0 lys2<math>\Delta</math>0 ura3<math>\Delta</math>0 are1::KanMX are2::KanMX ERG6-GFP::HIS3</i>                                                                        | This Study |
| RSY3272 | <i>MAT<math>\alpha</math> his3<math>\Delta</math>1 leu2<math>\Delta</math>0 lys2<math>\Delta</math>0 ura3<math>\Delta</math>0 ERG6-GFP::HIS3</i>                                                                                                | This Study |
| RSY3292 | <i>MAT<math>\alpha</math> his3<math>\Delta</math>1 leu2<math>\Delta</math>0 lys2<math>\Delta</math>0 ura3<math>\Delta</math>0 are1::KanMX are2::KanMX trp1::URA3 lro1::loxP GAL-GFP-DGA1::HIS3</i>                                              | This Study |
| RSY3337 | <i>MAT<math>\alpha</math> his3<math>\Delta</math>1 leu2<math>\Delta</math>0 lys2<math>\Delta</math>0 ura3<math>\Delta</math>0 are1::KanMX are2::KanMX trp1<math>\Delta</math> lro1::loxP GAL-GFP-DGA1::HIS3 pURA3-GAL-ERG6-RFP</i>              | This Study |
| RSY3402 | <i>MAT<math>\alpha</math> his3<math>\Delta</math>1 leu2<math>\Delta</math>0 lys2<math>\Delta</math>0 ura3<math>\Delta</math>0 pURA3-GAL-GFP-ERG6</i>                                                                                            | This Study |
| RSY3482 | <i>MAT<math>\alpha</math> his3<math>\Delta</math>1 leu2<math>\Delta</math>0 lys2<math>\Delta</math>0 ura3<math>\Delta</math>0 are1::KanMX are2::KanMX lro1::loxP DGA1-myc::HIS3</i>                                                             | This Study |
| RSY3604 | <i>MAT<math>\alpha</math> his3<math>\Delta</math>1 leu2<math>\Delta</math>0 lys2<math>\Delta</math>0 ura3<math>\Delta</math>0 are1::KanMX are2::KanMX trp1::URA3 lro1<math>\Delta</math>::TRP1 dga1::loxP pLEU2-GAL-GFP-TGL1 pURA3-HDEL-RFP</i> | This Study |
| RSY3605 | <i>MAT<math>\alpha</math> his3<math>\Delta</math>1 leu2<math>\Delta</math>0 lys2<math>\Delta</math>0 ura3<math>\Delta</math>0 are1::KanMX are2::KanMX trp1::URA3 lro1<math>\Delta</math>::TRP1 dga1::loxP pLEU2-GAL-GFP-YEH1 pURA3-HDEL-RFP</i> | This Study |
| RSY3755 | <i>MAT<math>\alpha</math> his3<math>\Delta</math>1 leu2<math>\Delta</math>0 lys2<math>\Delta</math>0 ura3<math>\Delta</math>0 are1::KanMX are2::KanMX lro1::loxP HIS3-GAL-DGA1</i>                                                              | This Study |
| RSY3758 | <i>MAT<math>\alpha</math> his3<math>\Delta</math>1 leu2<math>\Delta</math>0 lys2<math>\Delta</math>0 ura3<math>\Delta</math>0 dga1::KanMX lro1::KanMX ERG6-GFP::HIS3</i>                                                                        | This Study |
| RSY3770 | <i>MAT<math>\alpha</math> his3<math>\Delta</math>1 leu2<math>\Delta</math>0 lys2<math>\Delta</math>0 ura3<math>\Delta</math>0 trp1<math>\Delta</math> are1::KanMX are2::KanMX GAL-LRO1::TRP1 dga1::loxP pERG6-RFP-URA3</i>                      | This Study |
| RSY4359 | <i>MAT<math>\alpha</math> his3<math>\Delta</math>1 leu2<math>\Delta</math>0 lys2<math>\Delta</math>0 ura3<math>\Delta</math>0 pGAL-GFP-DGA1-URA3</i>                                                                                            | This Study |
| RSY4399 | <i>MAT<math>\alpha</math> his3<math>\Delta</math>1 leu2<math>\Delta</math>0 lys2<math>\Delta</math>0 ura3<math>\Delta</math>0 pGAL-GFP-URA3</i>                                                                                                 | This Study |
| RSY4452 | <i>MAT<math>\alpha</math> his3<math>\Delta</math>1 leu2<math>\Delta</math>0 lys2<math>\Delta</math>0 ura3<math>\Delta</math>0 pSEC63-GFP-URA3</i>                                                                                               | This Study |
| RSY4461 | <i>MAT<math>\alpha</math> sec12<sup>ts</sup> ade2 his3 ura3 can1 pGAL-GFP-DGA1-URA3</i>                                                                                                                                                         | This Study |
| RSY4465 | <i>MAT<math>\alpha</math> sec18<sup>ts</sup> his3<math>\Delta</math>1 leu2<math>\Delta</math>0 LYS2 ura3<math>\Delta</math>0 pGAL-GFP-DGA1-URA3</i>                                                                                             | This Study |
| RSY4509 | <i>MAT<math>\alpha</math> his3<math>\Delta</math>1 leu2<math>\Delta</math>0 lys2<math>\Delta</math>0 ura3<math>\Delta</math>0 pGAL-GFP-DGA1-</i>                                                                                                | This Study |

*URA3 pERG6-RFP-LEU2*

|         |                                                                                                                                                                                                                                                        |            |
|---------|--------------------------------------------------------------------------------------------------------------------------------------------------------------------------------------------------------------------------------------------------------|------------|
| RSY4534 | <i>MAT<math>\alpha</math> his3<math>\Delta</math>1 leu2<math>\Delta</math>0 lys2<math>\Delta</math>0 ura3<math>\Delta</math>0 trp1<math>\Delta</math><br/>are1::KanMX are2::KanMX GAL-LRO1::TRP1<br/>dgal::loxP pADH-GFP-TGL1-HIS3</i>                 | This Study |
| RSY4535 | <i>MAT<math>\alpha</math> his3<math>\Delta</math>1 leu2<math>\Delta</math>0 lys2<math>\Delta</math>0 ura3<math>\Delta</math>0 trp1<math>\Delta</math><br/>are1::KanMX are2::KanMX GAL-LRO1::TRP1<br/>dgal::loxP pADH-GFP-YEH1-HIS3</i>                 | This Study |
| RSY4612 | <i>MAT<math>\alpha</math> leu2<math>\Delta</math>0 ura3<math>\Delta</math>0 his3<math>\Delta</math>1 lys2<math>\Delta</math>0 fld1::KanMX<br/>pGAL-GFP-DGA1-URA3</i>                                                                                   | This Study |
| RSY4695 | <i>MAT<math>\alpha</math> his3<math>\Delta</math>1 leu2<math>\Delta</math>0 lys2<math>\Delta</math>0 ura3<math>\Delta</math>0 are1::KanMX<br/>are2::KanMX trp1<math>\Delta</math> lro1::loxP fld1::loxP GAL-GFP-<br/>DGA1::HIS3 pURA3-GAL-ERG6-RFP</i> | This Study |
| RSY4757 | <i>MAT<math>\alpha</math> sec21-1 his3<math>\Delta</math>1 leu2<math>\Delta</math>0 ura3<math>\Delta</math>0 pGAL-GFP-DGA1-<br/>URA3</i>                                                                                                               | This Study |
| RSY4758 | <i>MAT<math>\alpha</math> sec27-1 his3<math>\Delta</math>1 leu2<math>\Delta</math>0 ura3<math>\Delta</math>0 pGAL-GFP-DGA1-<br/>URA3</i>                                                                                                               | This Study |
| RSY4842 | <i>MAT<math>\alpha</math> his3<math>\Delta</math>1 leu2<math>\Delta</math>0 met15<math>\Delta</math>0 ura3<math>\Delta</math>0 HHF1-GFP-HIS3</i>                                                                                                       | This Study |

---
