# Supplementary figures and images for: Lipid droplets are functionally connected to the endoplasmic reticulum in Saccharomyces cerevisiae
Source: Oxford University Press journal article supplement (doi:10.1242/jcs.076836), 2011-06-22

**A**

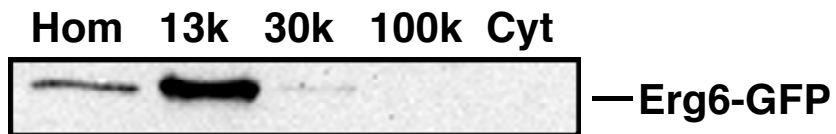

**B**

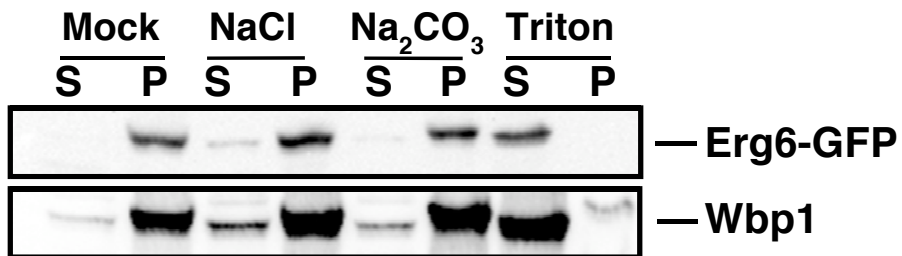

Supplement: jcs076836figs1.pdf [file jcs076836figs1.pdf]

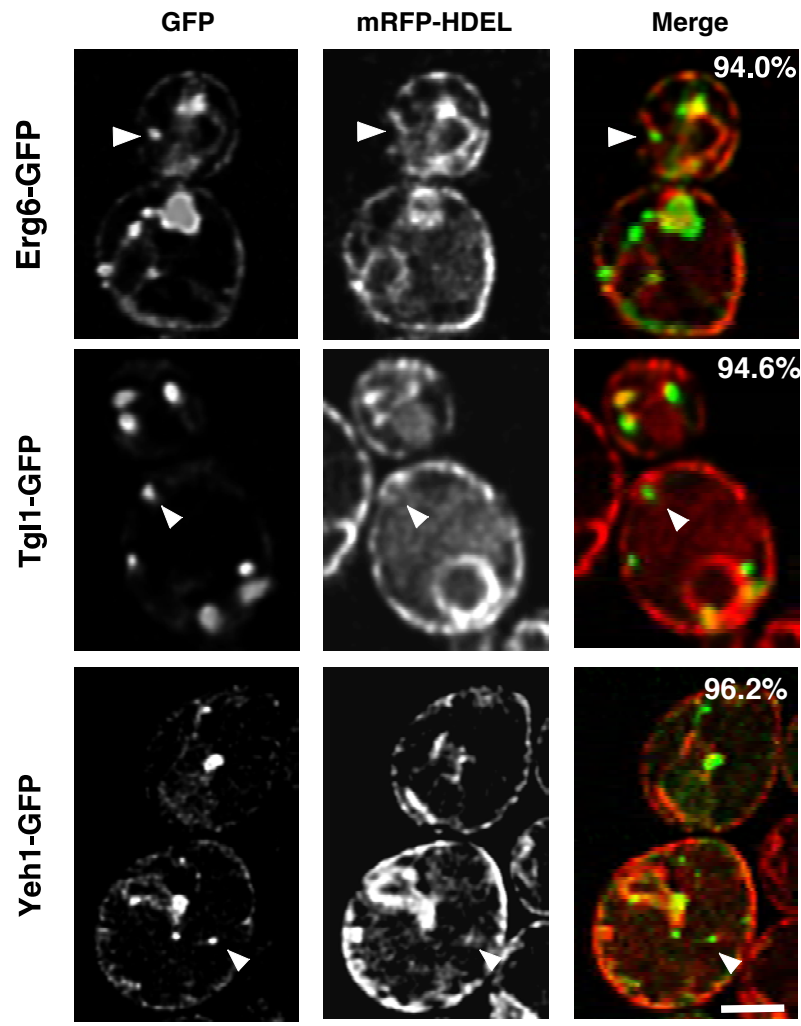

Supplement: jcs076836figs10.pdf [file jcs076836figs10.pdf]

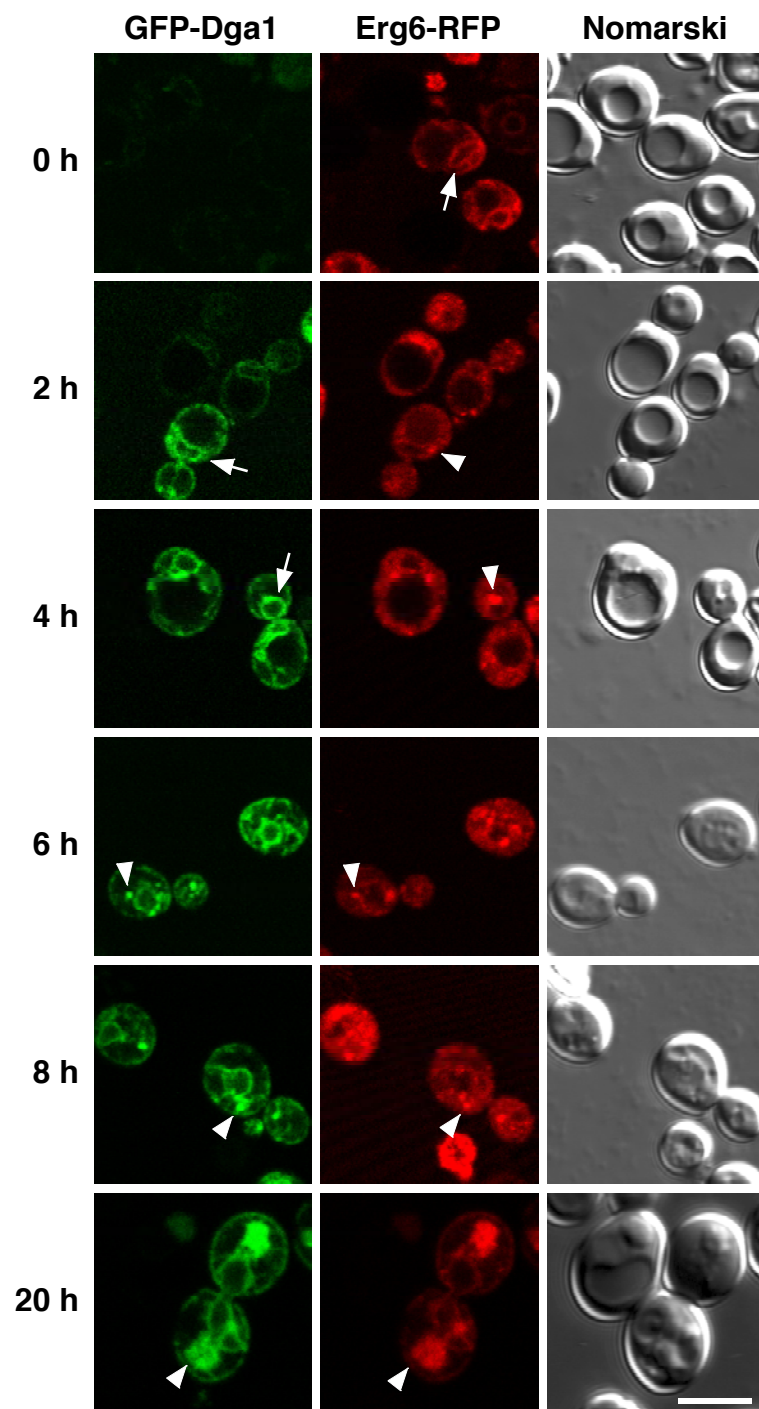

Supplement: jcs076836figs11.pdf [file jcs076836figs11.pdf]

**GAL-LRO1 induction**

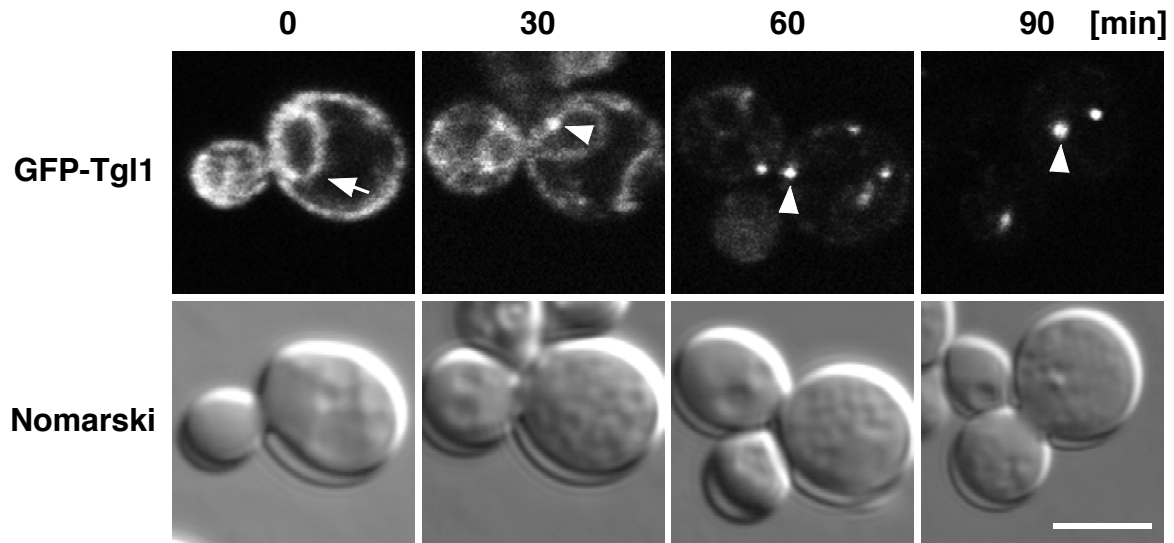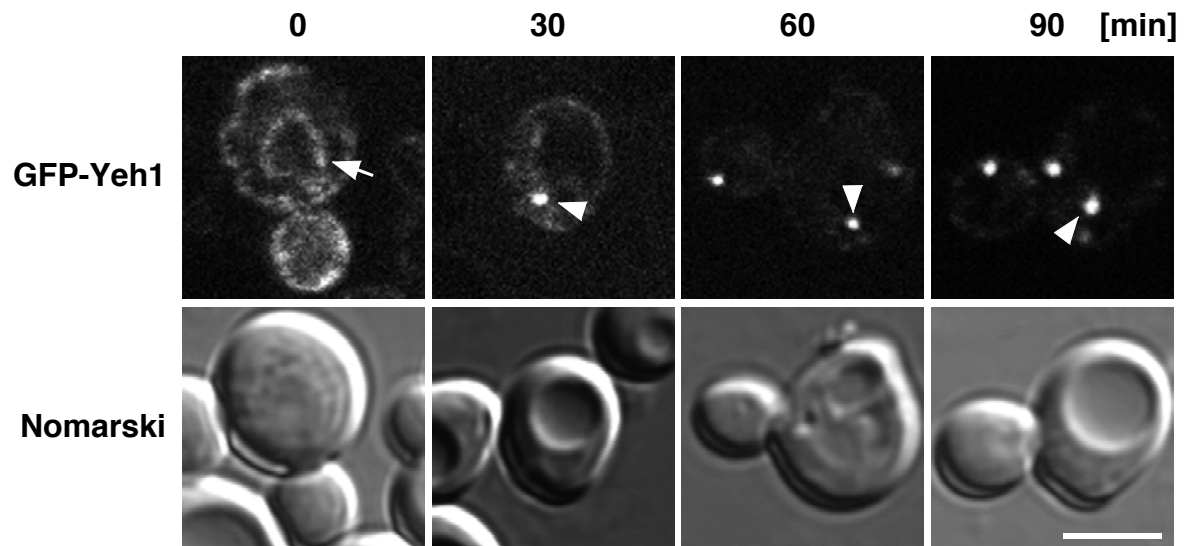

Supplement: jcs076836figs2.pdf [file jcs076836figs2.pdf]

**A**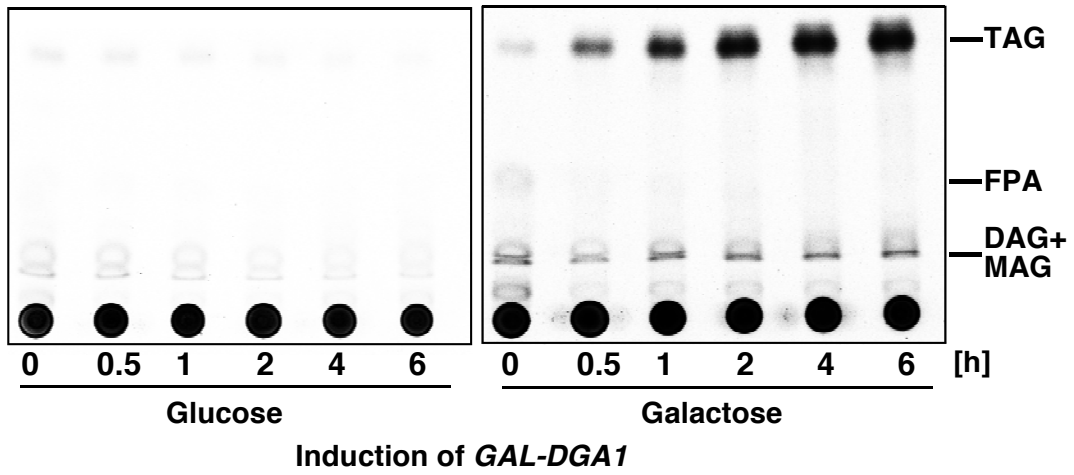**B**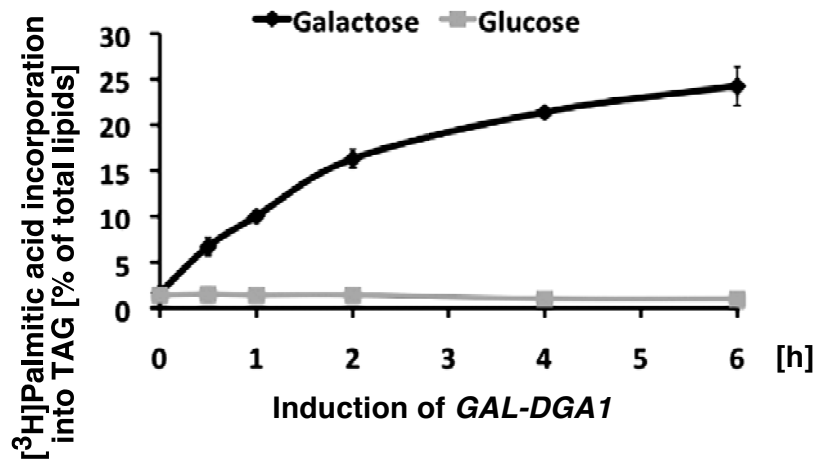**C**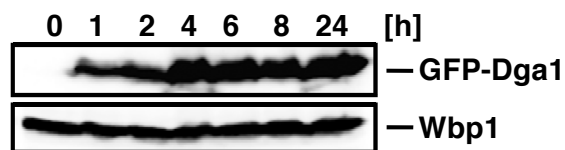

Supplement: jcs076836figs3.pdf [file jcs076836figs3.pdf]

**A**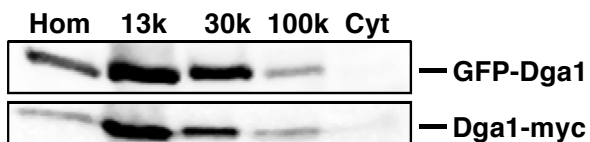**B**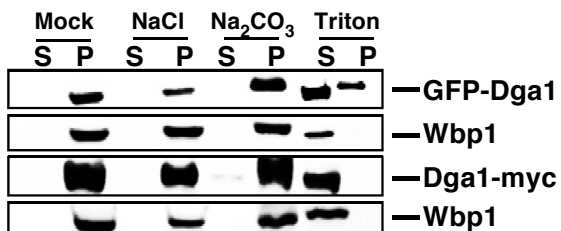**C**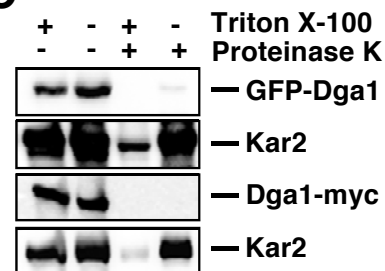**D**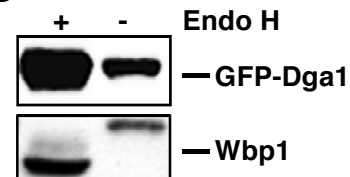**E**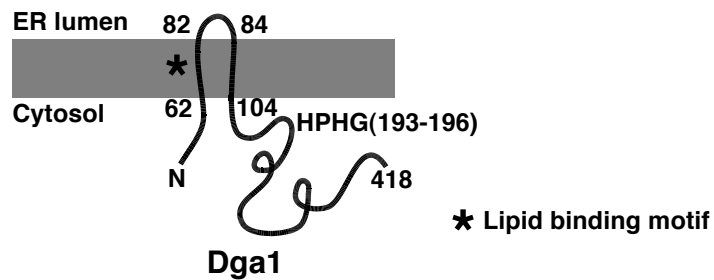

Supplement: jcs076836figs4.pdf [file jcs076836figs4.pdf]

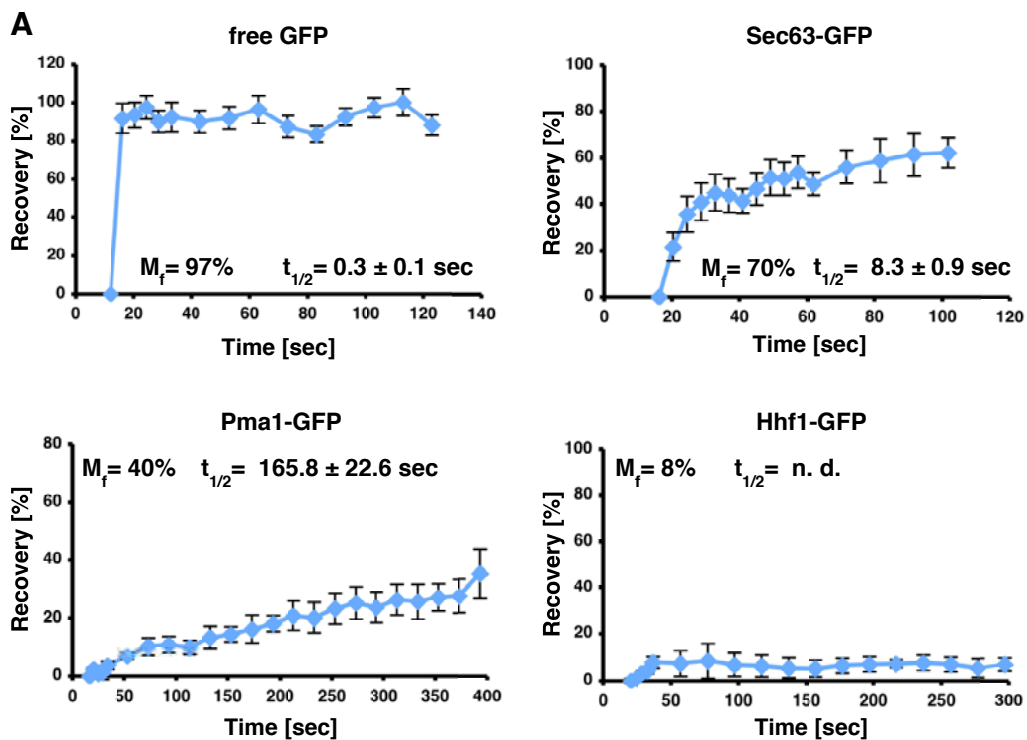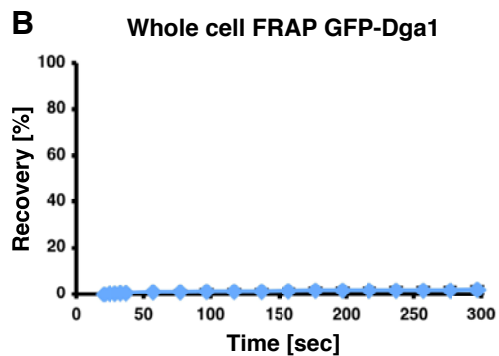

Supplement: jcs076836figs5.pdf [file jcs076836figs5.pdf]

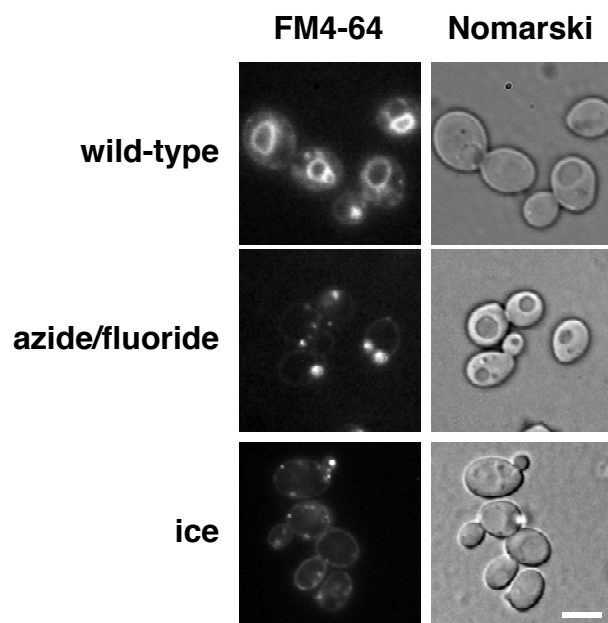

Supplement: jcs076836figs6.pdf [file jcs076836figs6.pdf]

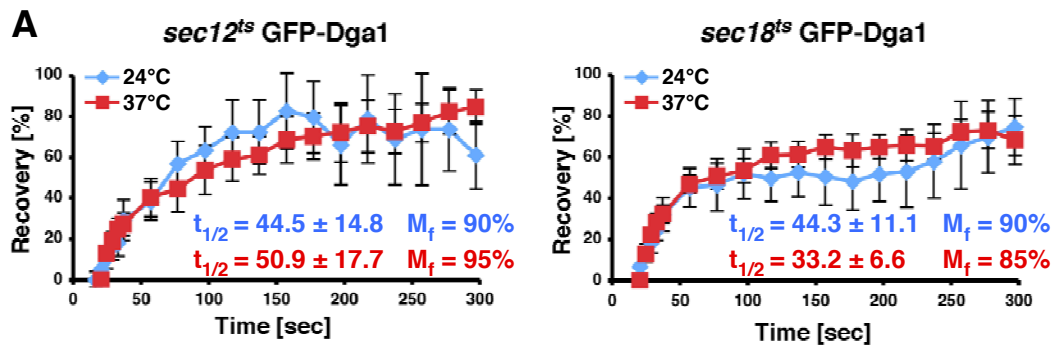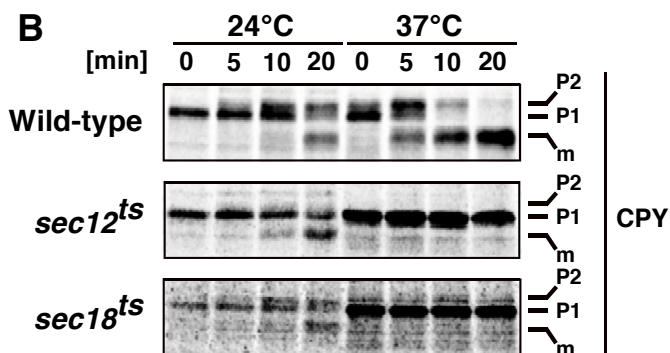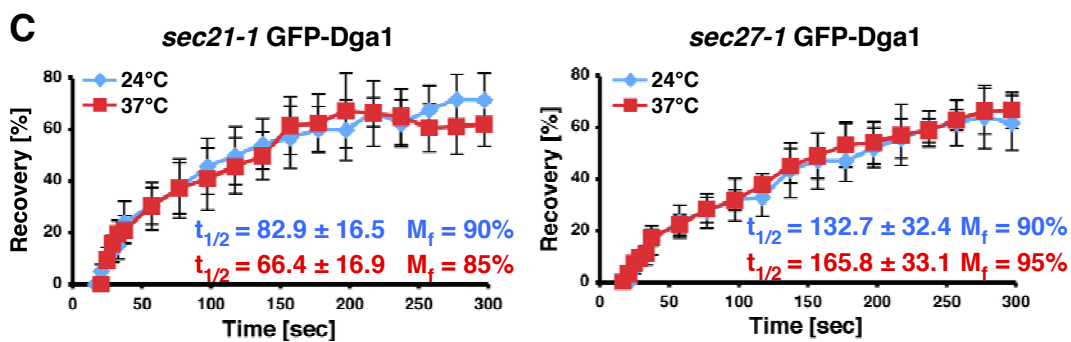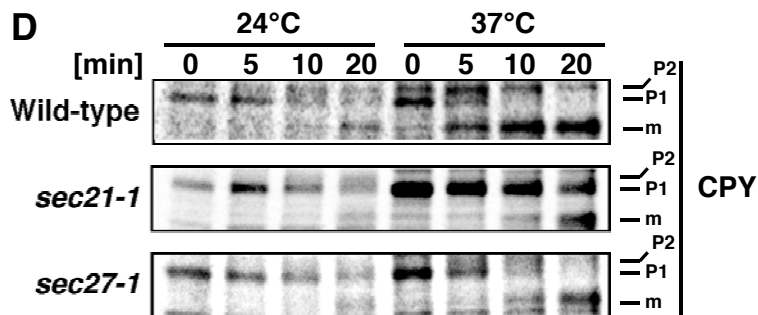

Supplement: jcs076836figs7.pdf [file jcs076836figs7.pdf]

**A**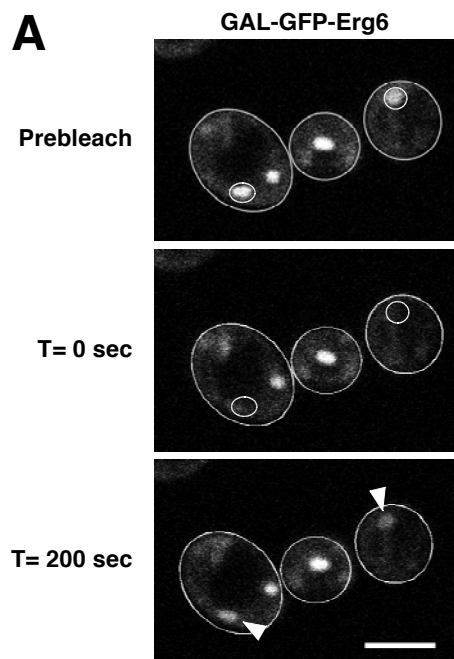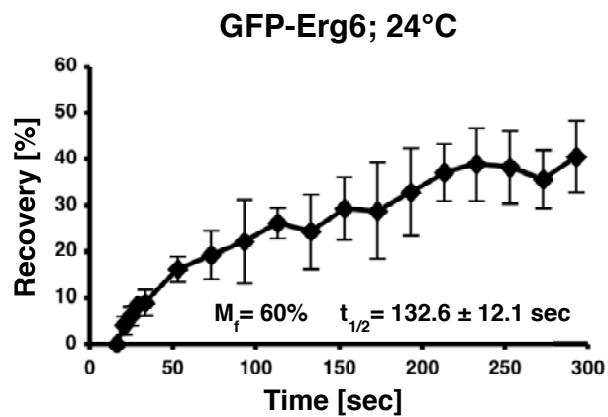**B**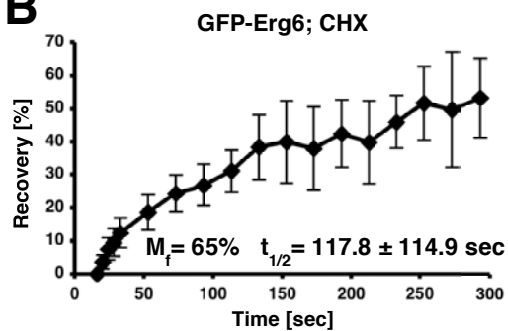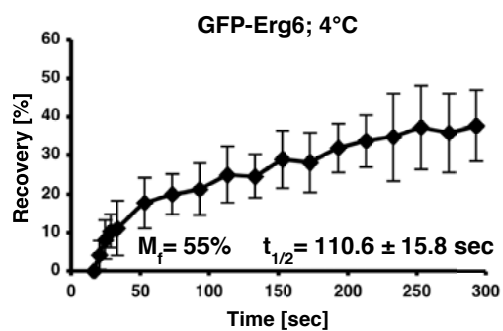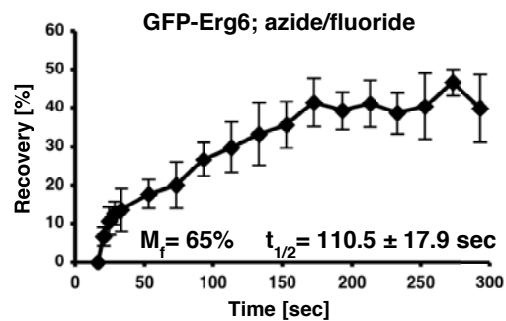

Supplement: jcs076836figs8.pdf [file jcs076836figs8.pdf]

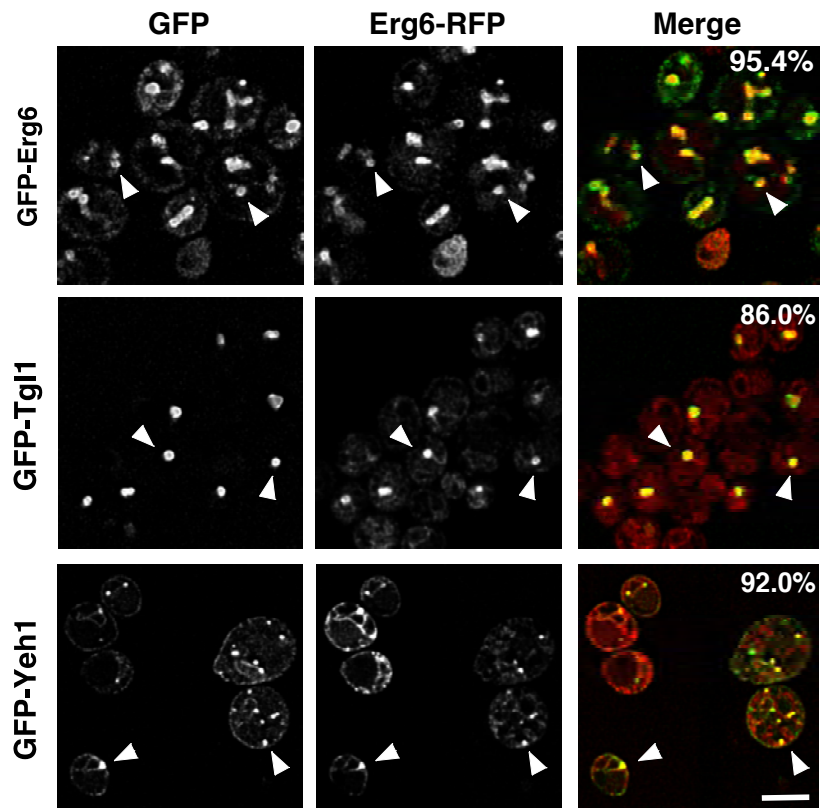

Supplement: jcs076836figs9.pdf [file jcs076836figs9.pdf]
